# Supplementary material for: Germline mutations in the alternative pathway of complement predispose to HELLP syndrome
Source: JCI journal article supplement (doi:10.1172/jci.insight.99128), 2018-03-21
Supplement: sd1 [file 1]

**Table S1: Tennessee Classification of HELLP syndrome**

|                        |                                                                                                        |
|------------------------|--------------------------------------------------------------------------------------------------------|
| HELLP Syndrome         | Aspartate Aminotransferase or Alanine Aminotransferase $\geq 70$ IU/L                                  |
|                        | Platelets $\leq 100,000$                                                                               |
|                        | Lactate Dehydrogenase Level $\geq 600$ IU/L<br>or 3x the upper limit of normal for lab reference range |
| Partial HELLP Syndrome | Meeting at least one criteria but not all                                                              |

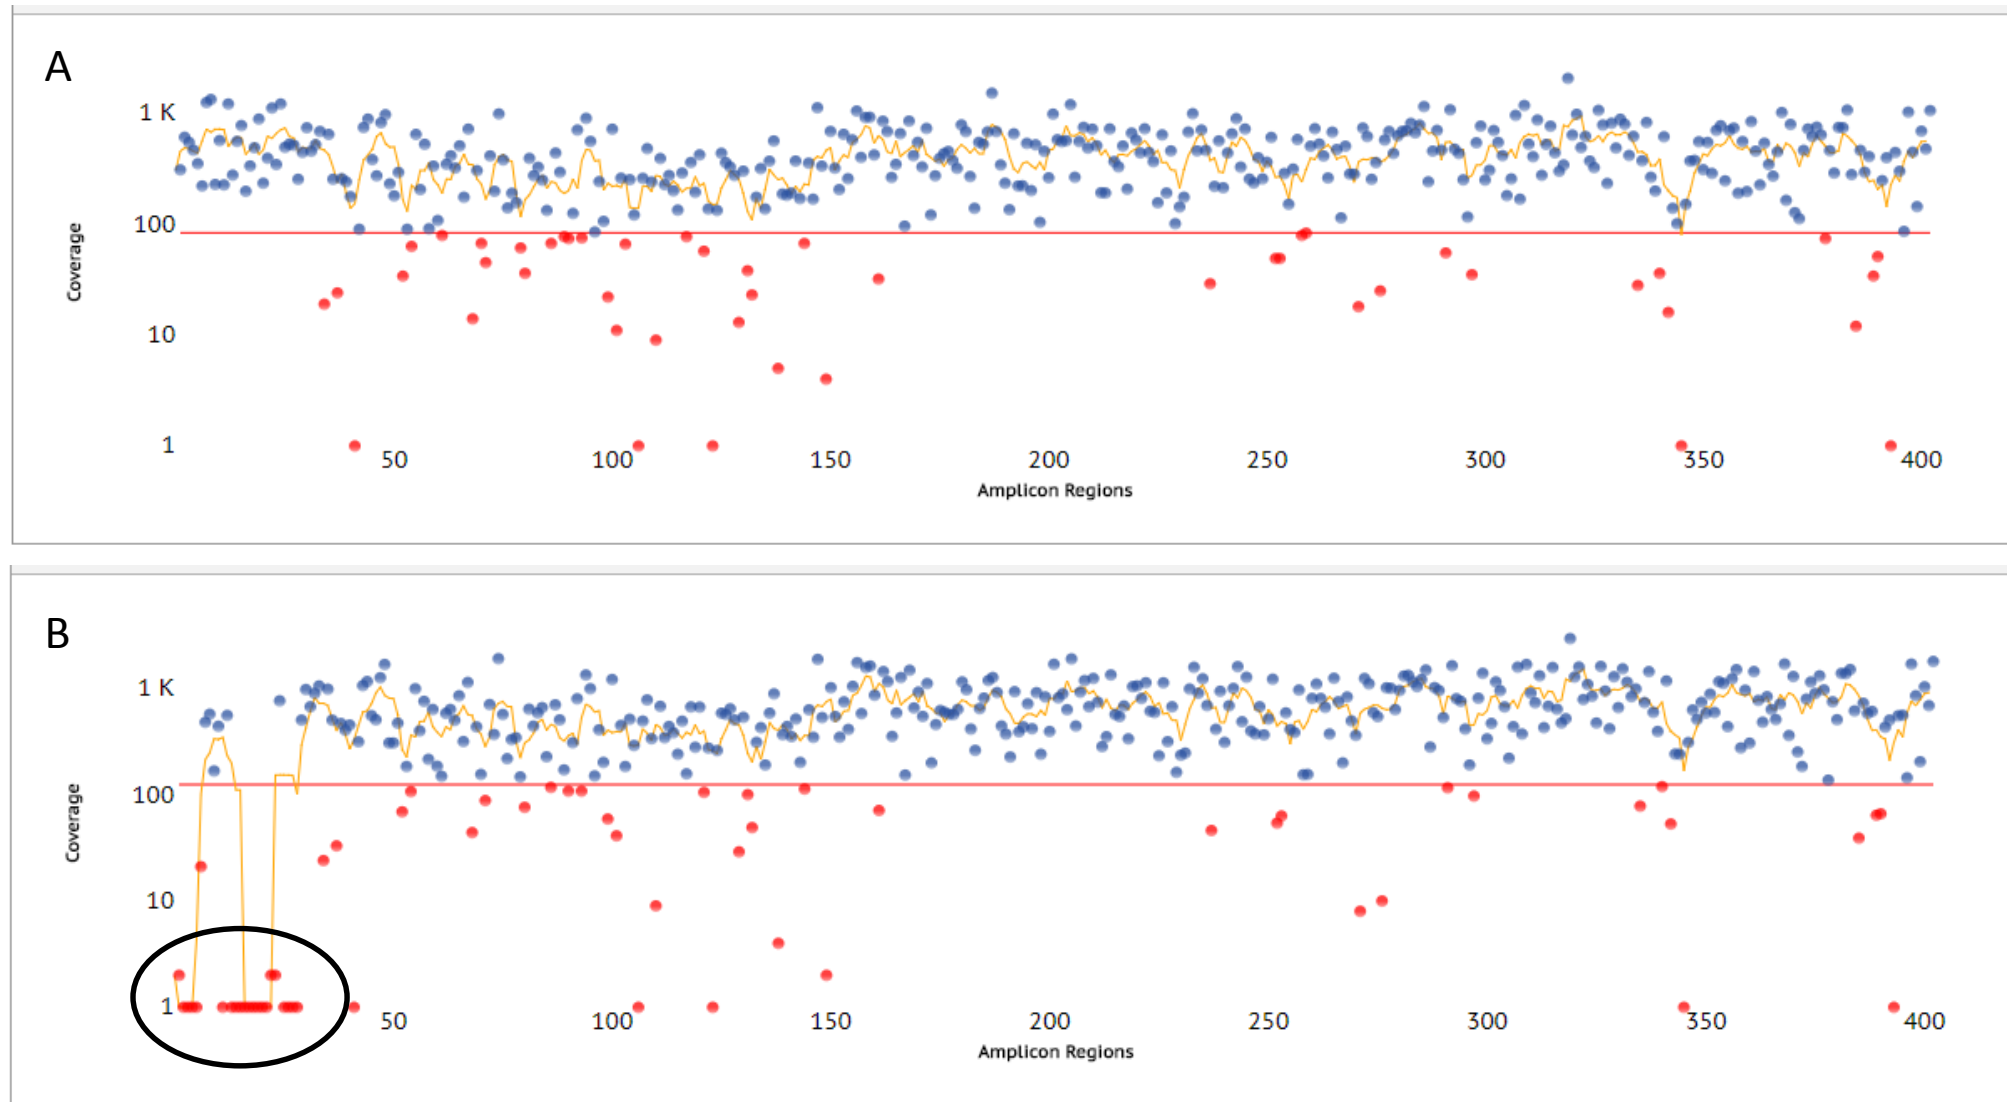

**Supplemental Figure 1: Analysis of amplicon coverage.** Two patient samples are shown, with each dot along the x-axis representing a unique amplicon (total 402). Coverage (reads) are on the y-axis, with blue dots above the arbitrary threshold of 100 and red dots below. A homozygous deletion of *CHFR1* and *CFHR3* is highlighted in sample B (black circle), with complete loss of amplicon coverage in the regions corresponding to those genes.
